# Supplementary material for: Vollzugsöffnende Maßnahmen und Entlassungsvorbereitung – Gesetzgebung und Praxis in den Bundesländern
Source: publisher site journal article supplement (doi:10.1515/mks-2023-0042), 2023-12-11
Supplement: Supplementary file 1 [file Tabellenanhang_2-10.docx]

**Tabelle 2: Langzeitausgang (LA), Urlaub, Freistellung aus bzw. von der Haft im Bundesländervergleich im Jahr 2019**

Strafgefangene insgesamt (einschließlich Jugendstrafvollzug)

| **1** | **2** | 3 | 4 | 5 | 6 | 7 | 8 | 9 | 10 | 11 | 12 | 13 | 14 | 15 | 16 |
| --- | --- | --- | --- | --- | --- | --- | --- | --- | --- | --- | --- | --- | --- | --- | --- |
| **BL** | **Strafge-fangene** (am Stichtag 31.3.2019) (abs.) | Gefange-ne, denen LA gewährt wurde  (abs.) | Gefange-ne mit LA (Sp. 3) pro 100 Gefangene der Stichtags-belegung | Anzahl LA insg. (abs.) | LA (Sp. 5) pro 100  Gefangene bzgl. Stichtags-belegung | Gefange-ne, denen erstmalig im Kalen-derjahr LA gewährt wurde (abs.) | Erstmalig gewährter LA (Sp. 7) pro 100 Gefan-gene bzgl. Stichtags-belegung | Quotient (Sp. 5 / Sp. 3) = Inzidenz, Zahl von LA pro Gefangenen | LA zur Entlassungsvor-bereitung (abs.) | Prozent-wert LA zur Entlas-sungsvorbereitung (Sp. 10) an LA insgesamt (Sp. 5) | Anzahl der gewähr-ten Tage LA (abs.) | Quotient Anzahl gewährter Tage (Sp. 12) / Anzahl der LA (Sp. 5) = durch-schnittl. Dauer d. LA | Nicht oder nicht freiwillig zurückgekehrt aus LA (abs.) | **Miss-brauch: % bzgl. Zahl von LA** insg. (Sp. 5) | **Miss-brauch: % bzgl. Zahl der Gefan-genen mit LA** (Sp. 1) |
| BW | 5.712 | 1.416 | 24,8 | 15.120 | 264,7 | 800 | 14,0 | 10,7 | 8.669 | 57,3 | 30.173 | 2,0 | 21 | 0,14 | 1,48 |
| BY | 8.460 | 1.315 | 15,5 | 10.921 | 129,1 | 833 | 9,8 | 8,3 | 5.115 | 46,8 | 22.027 | 2,0 | 6 | 0,05 | 0,46 |
| BE | 3.162 | 1.036 | 32,8 | 19.120 | 604,7 | 478 | 15,1 | 18,5 | 68 | 0,4 | 43.560 | 2,3 | 8 | 0,04 | 0,77 |
| BB | (1.078) | k. A. | k. A. | k. A. | k. A. | k. A. | k. A. | k. A. | k. A. | k. A. | k. A. | k. A. | k. A. | k. A. | k. A. |
| HB | 510 | 198 | 38,8 | 2.744 | 538,0 | 107 | 21,0 | 13,9 | 0 | 0,0 | 4.495 | 1,6 | 3 | 0,11 | 1,52 |
| HH | 1.398 | 466 | 33,3 | 10.745 | 768,6 | 211 | 15,1 | 23,1 | 5.404 | 50,3 | 0 | 0,0 | 11 | 0,10 | 2,36 |
| HE | 3.614 | 414 | 11,5 | 4.161 | 115,1 | 244 | 6,8 | 10,1 | 1.442 | 34,7 | 7.915 | 1,9 | 0 | 0,00 | 0,00 |
| MV | 931 | 119 | 12,8 | 1.279 | 137,4 | 79 | 8,5 | 10,7 | 0 | 0,0 | 2.821 | 2,2 | 0 | 0,00 | 0,00 |
| NI | 4.143 | 1.100 | 26,6 | 8.553 | 206,4 | 513 | 12,4 | 7,8 | 3.607 | 42,2 | 19.141 | 2,2 | 6 | 0,07 | 0,55 |
| NW | 13.142 | 4.484 | 34,1 | 55.904 | 425,4 | 2.493 | 19,0 | 12,5 | 21.043 | 37,6 | 88.897 | 1,6 | 94 | 0,17 | 2,10 |
| RP | 2.675 | 0** | 0,0 | 4.298 | 160,7 | 159 | 5,9 |  | 234 | 5,4 | 0** | 0,0 | 2 | 0,05 | k. A. |
| SL | (672) | k. A. | k. A. | k. A. | k. A. | k. A. | k. A. | k. A. | k. A. | k. A. | k. A. | k. A. | k. A. | k. A. | k. A. |
| SN | 2.797 | 315 | 11,3 | 3.471 | 124,1 | 178 | 6,4 | 11,0 | 556 | 16,0 | 7.596 | 2,2 | 0 | 0,00 | 0,00 |
| ST | 1.551 | 29 | 1,9 | 773 | 49,8 | 11 | 0,7 | 26,7 | 5 | 0,6 | 332 | 0,4 | 0 | 0,00 | 0,00 |
| SH | 1.062 | 197 | 18,5 | 2.060 | 194,0 | 116 | 10,9 | 10,5 | 2.012 | 97,7 | 4.971 | 2,4 | 0 | 0,00 | 0,00 |
| TH | 1.301 | 186 | 14,3 | 1.795 | 138,0 | 109 | 8,4 | 9,7 | 481 | 26,8 | 4.558 | 2,5 | 0 | 0,00 | 0,00 |
| ABL* | 43.878* (44.550) | 10.626 | 24,2 | 133.626 | 304,5 | 5.954 | 13,6 | 12,6 | 47.594 | 35,6 | 221.179 | 1,7 | 151 | 0,11 | 1,42 |
| NBL* | 6.580* (7.685) | 649 | 9,9 | 7.318 | 111,2 | 377 | 5,7 | 11,3 | 1.042 | 14,2 | 15.307 | 2,1 | 0 | 0,00 | 0,00 |
| D* | 50.458* (52.208) | 11.275 | 22,3 | 140.944 | 279,3 | 6.331 | 12,5 | 12,5 | 48.636 | 34,5 | 236.486 | 1,7 | 151 | 0,11 | 1,34 |

* ohne BB und SL aufgrund fehlender Lockerungsdaten, ** unplausible Quellenangabe, höchstwahrscheinlich Erhebungsfehler

**Tabelle 3: Langzeitausgang (LA), Urlaub, Freistellung aus bzw. von der Haft im Bundesländervergleich im Jahr 2020**

Strafgefangene insgesamt (einschließlich Jugendstrafvollzug)

| **1** | **2** | 3 | 4 | 5 | 6 | 7 | 8 | 9 | 10 | 11 | 12 | 13 | 14 | 15 | 16 |
| --- | --- | --- | --- | --- | --- | --- | --- | --- | --- | --- | --- | --- | --- | --- | --- |
| **BL** | **Strafge-fangene** (am Stichtag 31.3.2020) (abs.) | Gefange-ne, denen LA gewährt wurde  (abs.) | Gefange-ne mit LA (Sp. 3) pro 100 Gefangene der Stichtags-belegung | Anzahl LA insg. (abs.) | LA (Sp. 5) pro 100  Gefangene bzgl. Stichtags-belegung | Gefange-ne, denen erstmalig im Kalen-derjahr LA gewährt wurde (abs.) | Erstmalig gewährter LA (Sp. 7) pro 100 Gefan-gene bzgl. Stichtags-belegung | Quotient (Sp. 5 / Sp. 3) = Inzidenz, Zahl von LA pro Gefan-genen | LA zur Entlassungsvorbereitung (abs.) | Prozent-wert LA zur Entlas-sungsvorbereitung (Sp. 10) an LA insgesamt (Sp. 5) | Anzahl der gewähr-ten Tage LA (abs.) | Quotient Anzahl gewährter Tage (Sp. 12) / Anzahl der LA (Sp. 5) = durch-schnittl. Dauer d. LA | Nicht oder nicht freiwillig zurückgekehrt aus LA (abs.) | **Miss-brauch: % bzgl. Zahl von LA** insg. (Sp. 5) | **Miss-brauch: % bzgl. Zahl der Gefan-genen mit LA** (Sp. 1) |
| BW | 5.099 | 1.017 | 19,9 | 11.162 | 218,9 | 505 | 9,9 | 11,0 | 635 | 5,7 | 23.268 | 2,1 | 5 | 0,04 | 0,49 |
| BY | 7.778 | 588 | 7,6 | 2.485 | 31,9 | 213 | 2,7 | 4,2 | 1.154 | 46,4 | 5.800 | 2,3 | 3 | 0,12 | 0,51 |
| BE | 2.725 | 862 | 31,6 | 12.287 | 450,9 | 403 | 14,8 | 14,3 | 192 | 1,6 | 101.013 | 8,2 | 20 | 0,16 | 2,32 |
| BB | 939 | 75 | 8,0 | 527 | 56,1 | 45 | 4,8 | 7,0 | 0 | 0,0 | 6.574 | 12,5 | 2 | 0,38 | 2,67 |
| HB | 509 | 144 | 28,3 | 2.220 | 436,1 | 75 | 14,7 | 15,4 | 0 | 0,0 | 8.323 | 3,7 | 3 | 0,14 | 2,08 |
| HH | 1.275 | 413 | 32,4 | 7.250 | 568,6 | 216 | 16,9 | 17,6 | 2.915 | 40,2 | 21.357 | 2,9 | 6 | 0,08 | 1,45 |
| HE | 3.301 | 307 | 9,3 | 2.335 | 70,7 | 154 | 4,7 | 7,6 | 1.229 | 52,6 | 16.614 | 7,1 | 0 | 0,00 | 0,00 |
| MV | 787 | 106 | 13,5 | 1.189 | 151,1 | 73 | 9,3 | 11,2 | 4 | 0,3 | 4.286 | 3,6 | 2 | 0,17 | 1,89 |
| NI | 3.874 | 489 | 12,6 | 2.806 | 72,4 | 374 | 9,7 | 5,7 | 1.240 | 44,2 | 7.863 | 2,8 | 1 | 0,04 | 0,20 |
| NW | 11.890 | 3.751 | 31,5 | 34.122 | 287,0 | 1.762 | 14,8 | 9,1 | 10.978 | 32,2 | 62.176 | 1,8 | 54 | 0,16 | 1,44 |
| RP | 2.410 | 424 | 17,6 | 3.192 | 132,4 | 247 | 10,2 | 7,5 | 183 | 5,7 | 8.261 | 2,6 | 0 | 0,00 | 0,00 |
| SL | 630 | 82 | 13,0 | 1.260 | 200,0 | 46 | 7,3 | 15,4 | 0 | 0,0 | 3.607 | 2,9 | 1 | 0,08 | 1,22 |
| SN | 2.436 | 193 | 7,9 | 1.809 | 74,3 | 92 | 3,8 | 9,4 | 275 | 15,2 | 4.650 | 2,6 | 0 | 0,00 | 0,00 |
| ST | 1.454 | 18 | 1,2 | 43 | 3,0 | 10 | 0,7 | 2,4 | 0 | 0,0 | 373 | 8,7 | 0 | 0,00 | 0,00 |
| SH | 891 | 159 | 17,8 | 1.388 | 155,8 | 83 | 9,3 | 8,7 | 1.370 | 98,7 | 5.007 | 3,6 | 0 | 0,00 | 0,00 |
| TH | 1.197 | 129 | 10,8 | 1.149 | 96,0 | 86 | 7,2 | 8,9 | 399 | 34,7 | 4.643 | 4,0 | 2 | 0,17 | 1,55 |
| ABL | 40.382 | 8.236 | 20,4 | 80.507 | 199,4 | 4.078 | 10,1 | 9,8 | 19.896 | 24,7 | 263.289 | 3,3 | 93 | 0,12 | 1,13 |
| NBL | 6.813 | 521 | 7,6 | 4.717 | 69,2 | 306 | 4,5 | 9,1 | 678 | 14,4 | 20.526 | 4,4 | 6 | 0,13 | 1,15 |
| D | 47.195 | 8.757 | 18,6 | 85.224 | 180,6 | 4.384 | 9,3 | 9,7 | 20.574 | 24,1 | 283.815 | 3,3 | 99 | 0,12 | 1,13 |

**Tabelle 4: Langzeitausgang (LA), Urlaub, Freistellung aus bzw. von der Haft im Bundesländervergleich im Jahr 2021**

Strafgefangene insgesamt (einschließlich Jugendstrafvollzug)

| **1** | **2** | 3 | 4 | 5 | 6 | 7 | 8 | 9 | 10 | 11 | 12 | 13 | 14 | 15 | 16 |
| --- | --- | --- | --- | --- | --- | --- | --- | --- | --- | --- | --- | --- | --- | --- | --- |
| **BL** | **Strafge-fangene** (am Stichtag 31.3.2021) (abs.) | Gefange-ne, denen LA gewährt wurde  (abs.) | Gefange-ne mit LA (Sp. 3) pro 100 Gefangene der Stichtags-belegung | Anzahl LA insg. (abs.) | LA (Sp. 5) pro 100  Gefangene bzgl. Stichtagsbelegung | Gefange-ne, denen erstmalig im Kalen-derjahr LA gewährt wurde (abs.) | Erstmalig gewährter LA (Sp. 7) pro 100 Gefan-gene bzgl. Stichtags-belegung | Quotient (Sp. 5 / Sp. 3) = Inzidenz, Zahl von LA pro Gefangenen | LA zur Entlassungsvorbereitung (abs.) | Prozent-wert LA zur Entlas-sungsvorbereitung (Sp. 10) an LA insgesamt (Sp. 5) | Anzahl der gewähr-ten Tage LA (abs.) | Quotient Anzahl gewährter Tage (Sp. 12) / Anzahl der LA (Sp. 5) = durch-schnittl. Dauer d. LA | Nicht oder nicht freiwillig zurückgekehrt aus LA (abs.) | **Miss-brauch: % bzgl. Zahl von LA** insg. (Sp. 5) | **Miss-brauch: % bzgl. Zahl der Gefan-genen mit LA** (Sp. 1) |
| BW | 5.171 | 948 | 18,3 | 10.481 | 202,7 | 602 | 11,6 | 11,1 | 6.126 | 58,4 | 22.179 | 2,1 | 12 | 0,11 | 1,27 |
| BY | 7.267 | 320 | 4,4 | 1.473 | 20,3 | 277 | 3,8 | 4,6 | 622 | 42,2 | 4.034 | 2,7 | 0 | 0,00 | 0,00 |
| BE | 2.572 | 761 | 29,6 | 10.321 | 401,3 | 389 | 15,1 | 13,6 | 143 | 1,4 | 93.755 | 9,1 | 20 | 0,19 | 2,63 |
| BB | 925 | 48 | 5,2 | 217 | 23,5 | 30 | 3,2 | 4,5 | 0 | 0,0 | 4.896 | 22,6 | 0 | 0,00 | 0,00 |
| HB | 463 | 141 | 30,5 | 2.012 | 434,6 | 83 | 17,9 | 14,3 | 0 | 0,0 | 5.544 | 2,8 | 1 | 0,05 | 0,71 |
| HH | 1.327 | 431 | 32,5 | 9.952 | 750,0 | 211 | 15,9 | 23,1 | 4.851 | 48,7 | 20.871 | 2,1 | 10 | 0,10 | 2,32 |
| HE | 3.182 | 253 | 8,0 | 2.220 | 69,8 | 139 | 4,4 | 8,8 | 746 | 33,6 | 11.926 | 5,4 | 0 | 0,00 | 0,00 |
| MV | 828 | 105 | 12,7 | 798 | 96,4 | 73 | 8,8 | 7,6 | 4 | 0,5 | 1.943 | 2,4 | 3 | 0,38 | 2,86 |
| NI | 3.923 | 460 | 11,7 | 3.300 | 84,1 | 306 | 7,8 | 7,2 | 1.314 | 39,8 | 8.999 | 2,7 | 2 | 0,06 | 0,43 |
| NW | 11.680 | 3.560 | 30,5 | 29.519 | 252,7 | 1.922 | 16,5 | 8,3 | 8.293 | 28,1 | 55.795 | 1,9 | 49 | 0,17 | 1,38 |
| RP | 2.436 | 372 | 15,3 | 2.974 | 122,1 | 233 | 9,6 | 8,0 | 297 | 10,0 | 8.033 | 2,7 | 5 | 0,17 | 1,34 |
| SL | 626 | 77 | 12,3 | 1.072 | 171,2 | 58 | 9,3 | 13,9 | 1 | 0,1 | 2.743 | 2,6 | 0 | 0,00 | 0,00 |
| SN | 2.258 | 177 | 7,8 | 1.428 | 63,2 | 82 | 3,6 | 8,1 | 306 | 21,4 | 3.043 | 2,1 | 0 | 0,00 | 0,00 |
| ST | 1.480 | 11 | 0,7 | 19 | 1,3 | 7 | 0,5 | 1,7 | 0 | 0,0 | 262 | 13,8 | 0 | 0,00 | 0,00 |
| SH | 871 | 145 | 16,6 | 1.602 | 183,9 | 88 | 10,1 | 11,0 | 1.524 | 95,1 | 5.511 | 3,4 | 0 | 0,00 | 0,00 |
| TH | 1.207 | 77 | 6,4 | 822 | 68,1 | 50 | 4,1 | 10,7 | 171 | 20,8 | 1.863 | 2,3 | 0 | 0,00 | 0,00 |
| ABL | 39.518 | 7.468 | 18,9 | 74.926 | 189,6 | 4.308 | 10,9 | 10,0 | 23.917 | 31,9 | 239.390 | 3,2 | 99 | 0,13 | 1,33 |
| NBL | 6.698 | 418 | 6,2 | 3.284 | 49,0 | 242 | 3,6 | 7,9 | 481 | 14,6 | 12.007 | 3,7 | 3 | 0,09 | 0,72 |
| D | 46.216 | 7.886 | 17,1 | 78.210 | 169,2 | 4.550 | 9,8 | 9,9 | 24.398 | 31,2 | 251.397 | 3,2 | 102 | 0,13 | 1,29 |

**Tabelle 5: Ausgänge und Begleitausgänge im Bundesländervergleich im Jahr 2019**

Strafgefangene insgesamt (einschließlich Jugendstrafvollzug)

| 1 | 2 | 3 | 4 | 5 | 6 | 7 | 8 | 9 | 10 | 11 | 12 | 13 | 14 |
| --- | --- | --- | --- | --- | --- | --- | --- | --- | --- | --- | --- | --- | --- |
| **BL** | **Strafge-fangene** (am Stichtag 31.3.2019) (abs.) | **Gefangene, denen Ausgang gewährt wurde**  (abs.) | Gefangene mit Aus-gang (Sp. 3) pro 100 Gefangene der Stich-tagsbelegg. | Anzahl Ausgänge insg. (abs.) | Ausgänge (Sp. 5) pro 100 Gefangene zum Stichtag | Quotient Sp. 5 / Sp. 3) = Inzidenz, Zahl von Ausgängen pro Gefangenen | Gef. mit Ausgang erstmalig im Kalen-derjahr (abs.) | Erstmalig gewährter Ausgang pro 100 Gefangene bzgl. Stich-tagsbelegg. | Ausgänge zur Entlas-sungsvor-bereitung (abs.) | Ausgänge zur Entlas-sungsvor-bereitung pro 100 Gefangene bzgl. Stich-tagsbelegg. | Nicht oder nicht freiwillig zurückgekehrt (abs.) | **Miss-brauch: %** bzgl**. Zahl von Ausgängen** insg. (Sp. 5) | **Miss-brauch: %** bzgl. **Zahl** der **Gefangenen** mit Ausgang (Sp. 3) |
| BW | 5.712 | 2.099 | 36,7 | 34.119 | 597,3 | 16,3 | 1.130 | 19,8 | 32.070 | 561,4 | 8 | 0,02 | 0,38 |
| BY | 8.460 | 1.753 | 20,7 | 11.157 | 131,9 | 6,4 | 1.278 | 15,1 | 5.350 | 63,2 | 4 | 0,04 | 0,23 |
| BE | 3.162 | 1.826 | 57,7 | 158.815 | 5.022,6 | 87,0 | 883 | 27,9 | 716 | 22,6 | 68 | 0,04 | 3,72 |
| BB | (1.078) | k. A. | k. A. | k. A. | k. A. | k. A. | k. A. | k. A. | k. A. | k. A. | k. A. | k. A. | k. A. |
| HB | 510 | 306 | 60,0 | 7.322 | 1.435,7 | 23,9 | 177 | 34,7 | 0 | 0,0 | 6 | 0,08 | 1,96 |
| HH | 1.398 | 528 | 37,8 | 17.780 | 1.271,8 | 33,7 | 245 | 17,5 | 35 | 2,5 | 5 | 0,03 | 0,95 |
| HE | 3.614 | 577 | 16,0 | 6.485 | 179,4 | 11,2 | 336 | 9,3 | 12 | 0,3 | 1 | 0,02 | 0,17 |
| MV | 931 | 509 | 54,7 | 10.400 | 1.117,1 | 20,4 | 331 | 35,6 | 451 | 48,4 | 3 | 0,03 | 0,59 |
| NI | 4.143 | 1.850 | 44,7 | 61.330 | 1.480,3 | 33,2 | 1.174 | 28,3 | 764 | 18,4 | 10 | 0,02 | 0,54 |
| NW | 13.142 | 7.621 | 58,0 | 270.244 | 2.056,3 | 35,5 | 4.498 | 34,2 | 0** | 0,0 | 158 | 0,06 | 2,07 |
| RP | 2.675 | 0** | 0,0 | 23.650 | 884,1 |  | 655 | 24,5 | 0** | 0,0 | 1 | 0,00 | 0,00 |
| SL | (672) | k. A. | k. A. | k. A. | k. A. | k. A. | k. A. | k. A. | k. A. | k. A. | k. A. | k. A. | k. A. |
| SN | 2.797 | 882 | 31,5 | 10.866 | 388,5 | 12,3 | 576 | 20,6 | 468 | 16,7 | 5 | 0,05 | 0,57 |
| ST | 1.551 | 206 | 13,3 | 3.771 | 243,1 | 18,3 | 163 | 10,5 | 1 | 0,1 | 1 | 0,03 | 0,49 |
| SH | 1.062 | 399 | 37,6 | 18.566 | 1.748,2 | 46,5 | 240 | 22,6 | 18.540 | 1.745,8 | 2 | 0,01 | 0,50 |
| TH | 1.301 | 380 | 29,2 | 2.686 | 206,5 | 7,1 | 239 | 18,4 | 0** | 0,0 | 2 | 0,07 | 0,53 |
| ABL* | 43.878* (44.550) | 16.959 | 38,7 | 609.468 | 1.389,0 | 35,9 | 10.616 | 24,2 | 57.487 | 131,0 | 263 | 0,04 | 1,55 |
| NBL* | 6.580* (7.685) | 1.977 | 30,0 | 27.723 | 421,3 | 14,0 | 1.309 | 19,9 | 920 | 14,0 | 11 | 0,04 | 0,56 |
| D* | 50.458* (52.208) | 18.936 | 37,5 | 637.191 | 1.262,8 | 33,6 | 11.925 | 23,6 | 58.407 | 115,8 | 274 | 0,04 | 1,45 |

* ohne BB und SL aufgrund fehlender Lockerungsdaten, ** unplausible Quellenangabe, höchstwahrscheinlich Erhebungsfehler

**Tabelle 6: Ausgänge und Begleitausgänge im Bundesländervergleich im Jahr 2020**

Strafgefangene insgesamt (einschließlich Jugendstrafvollzug)

| 1 | 2 | 3 | 4 | 5 | 6 | 7 | 8 | 9 | 10 | 11 | 12 | 13 | 14 |
| --- | --- | --- | --- | --- | --- | --- | --- | --- | --- | --- | --- | --- | --- |
| **BL** | **Strafge-fangene** (am Stichtag 31.3.2020) (abs.) | **Gefangene, denen Ausgang gewährt wurde**  (abs.) | Gefangene mit Aus-gang (Sp. 3) pro 100 Gefangene der Stich-tagsbelegg. | Anzahl Ausgänge insg. (abs.) | Ausgänge (Sp. 5) pro 100 Gefangene zum Stichtag | Quotient Sp. 5 / Sp. 3) = Inzidenz, Zahl von Ausgängen pro Gefangenen | Gef. mit Ausgang erstmalig im Kalen-derjahr (abs.) | Erstmalig gewährter Ausgang pro 100 Gefangene bzgl. Stich-tagsbelegg. | Ausgänge zur Entlas-sungsvor-bereitung (abs.) | Ausgänge zur Entlas-sungsvor-bereitung pro 100 Gefangene bzgl. Stich-tagsbelegg. | Nicht oder nicht freiwillig zurückgekehrt (abs.) | **Miss-brauch: %** bzgl**. Zahl von Ausgängen** insg. (Sp. 5) | **Miss-brauch: %** bzgl. **Zahl** der **Gefangenen** mit Ausgang (Sp. 3) |
| BW | 5.099 | 1.551 | 30,4 | 25.644 | 502,9 | 16,5 | 786 | 15,4 | 24.032 | 471,3 | 5 | 0,02 | 0,32 |
| BY | 7.778 | 895 | 11,5 | 4.486 | 57,7 | 5,0 | 493 | 6,3 | 2.103 | 27,0 | 2 | 0,04 | 0,22 |
| BE | 2.725 | 1.434 | 52,6 | 69.085 | 2.535,2 | 48,2 | 633 | 23,2 | 283 | 10,4 | 26 | 0,04 | 1,81 |
| BB | 939 | 379 | 40,4 | 2.741 | 291,9 | 7,2 | 209 | 22,3 | 0* | 0,0 | 0 | 0,00 | 0,00 |
| HB | 509 | 247 | 48,5 | 4.636 | 910,8 | 18,8 | 132 | 25,9 | 0* | 0,0 | 3 | 0,06 | 1,21 |
| HH | 1.275 | 587 | 46,0 | 17.463 | 1.369,6 | 29,7 | 273 | 21,4 | 15 | 1,2 | 3 | 0,02 | 0,51 |
| HE | 3.301 | 346 | 10,5 | 3.227 | 97,8 | 9,3 | 195 | 5,9 | 6 | 0,2 | 0 | 0,00 | 0,00 |
| MV | 787 | 455 | 57,8 | 7.709 | 979,5 | 16,9 | 281 | 35,7 | 24 | 3,0 | 3 | 0,04 | 0,66 |
| NI | 3.874 | 1.259 | 32,5 | 25.066 | 647,0 | 19,9 | 721 | 18,6 | 444 | 11,5 | 3 | 0,01 | 0,24 |
| NW | 11.890 | 6.037 | 50,8 | 179.458 | 1.509,3 | 29,7 | 3.052 | 25,7 | 0* | 0,0 | 92 | 0,05 | 1,52 |
| RP | 2.410 | 670 | 27,8 | 26.383 | 1.094,7 | 39,4 | 395 | 16,4 | 3.631 | 150,7 | 2 | 0,01 | 0,30 |
| SL | 630 | 125 | 19,8 | 1.343 | 213,2 | 10,7 | 62 | 9,8 | 0* | 0,0 | 0 | 0,00 | 0,00 |
| SN | 2.436 | 637 | 26,1 | 5.616 | 230,5 | 8,8 | 339 | 13,9 | 275 | 11,3 | 5 | 0,09 | 0,78 |
| ST | 1.454 | 148 | 10,2 | 2.439 | 167,7 | 16,5 | 76 | 5,2 | 0* | 0,0 | 0 | 0,00 | 0,00 |
| SH | 891 | 314 | 35,2 | 10.841 | 1.216,7 | 34,5 | 161 | 18,1 | 10.835 | 1.216,0 | 1 | 0,01 | 0,32 |
| TH | 1.197 | 246 | 20,6 | 1.307 | 109,2 | 5,3 | 132 | 11,0 | 0* | 0,0 | 2 | 0,15 | 0,81 |
| ABL | 40.382 | 13.465 | 33,3 | 367.632 | 910,4 | 27,3 | 6.903 | 17,1 | 41.349 | 102,4 | 137 | 0,04 | 1,02 |
| NBL | 6.813 | 1.865 | 27,4 | 19.812 | 290,8 | 10,6 | 1.037 | 15,2 | 299 | 4,4 | 10 | 0,05 | 0,54 |
| D | 47.195 | 15.330 | 32,5 | 387.444 | 820,9 | 25,3 | 7.940 | 16,8 | 41.648 | 88,2 | 147 | 0,04 | 0,96 |

* unplausible Quellenangabe, höchstwahrscheinlich Erhebungsfehler

**Tabelle 7: Ausgänge und Begleitausgänge im Bundesländervergleich im Jahr 2021**

Strafgefangene insgesamt (einschließlich Jugendstrafvollzug)

| 1 | 2 | 3 | 4 | 5 | 6 | 7 | 8 | 9 | 10 | 11 | 12 | 13 | 14 |
| --- | --- | --- | --- | --- | --- | --- | --- | --- | --- | --- | --- | --- | --- |
| **BL** | **Strafge-fangene** (am Stichtag 31.3.2021) (abs.) | **Gefangene, denen Ausgang gewährt wurde**  (abs.) | Gefangene mit Aus-gang (Sp. 3) pro 100 Gefangene der Stich-tagsbelegg. | Anzahl Ausgänge insg. (abs.) | Ausgänge (Sp. 5) pro 100 Gefangene zum Stichtag | Quotient Sp. 5 / Sp. 3) = Inzidenz, Zahl von Ausgängen pro Gefangenen | Gef. mit Ausgang erstmalig im Kalen-derjahr (abs.) | Erstmalig gewährter Ausgang pro 100 Gefangene bzgl. Stich-tagsbelegg. | Ausgänge zur Entlas-sungsvor-bereitung (abs.) | Ausgänge zur Entlas-sungsvor-bereitung pro 100 Gefangene bzgl. Stich-tagsbelegg. | Nicht oder nicht freiwillig zurückgekehrt (abs.) | **Miss-brauch: %** bzgl**. Zahl von Ausgängen** insg. (Sp. 5) | **Miss-brauch: %** bzgl. **Zahl** der **Gefangenen** mit Ausgang (Sp. 3) |
| BW | 5.171 | 1.406 | 27,2 | 21.972 | 424,9 | 15,6 | 819 | 15,8 | 20.779 | 401,8 | 6 | 0,03 | 0,43 |
| BY | 7.267 | 549 | 7,6 | 2.550 | 35,1 | 4,6 | 480 | 6,6 | 1.272 | 17,5 | 1 | 0,04 | 0,18 |
| BE | 2.572 | 1.184 | 46,0 | 78.576 | 3.055,1 | 66,4 | 656 | 25,5 | 145 | 5,6 | 33 | 0,04 | 2,79 |
| BB | 925 | 289 | 31,2 | 2.774 | 299,9 | 9,6 | 170 | 18,4 | 0* | 0,0 | 0 | 0,00 | 0,00 |
| HB | 463 | 210 | 45,4 | 4.632 | 1.000,4 | 22,1 | 131 | 28,3 | 0* | 0,0 | 4 | 0,09 | 1,90 |
| HH | 1.327 | 596 | 44,9 | 24.215 | 1.824,8 | 40,6 | 237 | 17,9 | 20 | 1,5 | 4 | 0,02 | 0,67 |
| HE | 3.182 | 393 | 12,4 | 4.687 | 147,3 | 11,9 | 246 | 7,7 | 52 | 1,6 | 2 | 0,04 | 0,51 |
| MV | 828 | 463 | 55,9 | 8.571 | 1.035,1 | 18,5 | 320 | 38,6 | 20 | 2,4 | 2 | 0,02 | 0,43 |
| NI | 3.923 | 1.290 | 32,9 | 25.465 | 649,1 | 19,7 | 797 | 20,3 | 184 | 4,7 | 8 | 0,03 | 0,62 |
| NW | 11.680 | 6.275 | 53,7 | 184.704 | 1.581,4 | 29,4 | 3.238 | 27,7 | 0* | 0,0 | 103 | 0,06 | 1,64 |
| RP | 2.436 | 638 | 26,2 | 23.583 | 968,1 | 37,0 | 383 | 15,7 | 3.847 | 157,9 | 5 | 0,02 | 0,78 |
| SL | 626 | 135 | 21,6 | 1.205 | 192,5 | 8,9 | 95 | 15,2 | 0* | 0,0 | 0 | 0,00 | 0,00 |
| SN | 2.258 | 485 | 21,5 | 5.714 | 253,1 | 11,8 | 292 | 12,9 | 199 | 8,8 | 1 | 0,02 | 0,21 |
| ST | 1.480 | 135 | 9,1 | 2.263 | 152,9 | 16,8 | 91 | 6,1 | 0* | 0,0 | 0 | 0,00 | 0,00 |
| SH | 871 | 268 | 30,8 | 13.038 | 1.496,9 | 48,6 | 157 | 18,0 | 13.028 | 1.495,8 | 0 | 0,00 | 0,00 |
| TH | 1.207 | 168 | 13,9 | 946 | 78,4 | 5,6 | 121 | 10,0 | 0* | 0,0 | 0 | 0,00 | 0,00 |
| ABL | 39.518 | 12.944 | 32,8 | 384.627 | 973,3 | 29,7 | 7.239 | 18,3 | 39.327 | 99,5 | 166 | 0,04 | 1,28 |
| NBL | 6.698 | 1.540 | 23,0 | 20.268 | 302,6 | 13,2 | 994 | 14,8 | 219 | 3,3 | 3 | 0,01 | 0,19 |
| D | 46.216 | 14.484 | 31,3 | 404.895 | 876,1 | 28,0 | 8.233 | 17,8 | 39.546 | 85,6 | 169 | 0,04 | 1,17 |

* unplausible Quellenangabe, höchstwahrscheinlich Erhebungsfehler

**Tabelle 8: Freigang im Bundesländervergleich im Jahr 2019**

Strafgefangene insgesamt (einschließlich Jugendstrafvollzug)

| 1 | 2 | 3 | 4 | 5 | 6 | 7 | 8 | 9 | 10 | 11 | 12 | 13 | 14 |
| --- | --- | --- | --- | --- | --- | --- | --- | --- | --- | --- | --- | --- | --- |
| **BL** | **Strafgefangene** (am Stichtag 31.3.2019) (abs.) | **Gef., denen Freigang gewährt wurde**  (abs.) | Freigänger (Sp. 3) pro 100 Gefangene zum Stichtag | Anzahl der Tage im Freigang insg. (abs.) | Quotient Sp. 5 / Sp. 3 = Inzidenz, Zahl von Freigängen pro Gefangenen | Gef., denen erstmalig im Kalenderjahr Freigang gewährt wurde (abs.) | Erstmalig gewährter Freigang (Sp. 7) pro 100 Gefangene bzgl. Stich-tagsbelegung | Beendigung des Freigangs (abs.) | Davon durch Widerruf (abs.) | Anteil % Widerruf an Beendigungen des Frei-gangs insg. (Sp 10 / Sp 9 * 100) | Missbrauch: Nicht oder nicht frei-willig zurück-gekehrt aus Freigang (abs.) | **Missbrauch: %** von Sp. 12 bzgl. **Zahl von Tagen** im Freigang insg. (Sp. 5) | **Missbrauch: %** von Sp. 12 bzgl. Zahl der **Gefangenen** mit Freigang (Sp. 3) |
| BW | 5.712 | 902 | 15,8 | 63.260 | 70,1 | 586 | 10,3 | 679 | 82 | 12,1 | 3 | 0,005 | 0,33 |
| BY | 8.460 | 530 | 6,3 | 29.375 | 55,4 | 396 | 4,7 | 399 | 52 | 13,0 | 1 | 0,003 | 0,19 |
| BE | 3.162 | 210 | 6,6 | 9.762 | 46,5 | 171 | 5,4 | 438 | 20 | 4,6 | 5 | 0,051 | 2,38 |
| BB | (1.078) | k. A. | k. A. | k. A. | k. A. | k. A. | k. A. | k. A. | k. A. | k. A. | k. A. | k. A. | k. A. |
| HB | 510 | 164 | 32,2 | 16.821 | 102,6 | 137 | 26,9 | 67 | 1 | 1,5 | 2 | 0,012 | 1,22 |
| HH | 1.398 | 414 | 29,6 | 0 | 0,0 | 332 | 23,7 | 292 | 129 | 44,2 | 3 |  | 0,72 |
| HE | 3.614 | 304 | 8,4 | 14.701 | 48,4 | 190 | 5,3 | 161 | 20 | 12,4 | 1 | 0,007 | 0,33 |
| MV | 931 | 172 | 18,5 | 10.513 | 61,1 | 154 | 16,5 | 61 | 5 | 8,2 | 0 | 0,000 | 0,00 |
| NI | 4.143 | 450 | 10,9 | 28.269 | 62,8 | 329 | 7,9 | 154 | 75 | 48,7 | 2 | 0,007 | 0,44 |
| NW | 13.142 | 1.855 | 14,1 | 156.234 | 84,2 | 1.644 | 12,5 | 94 | 94** | 100,0** | 4 | 0,003 | 0,22 |
| RP | 2.675 | 0 | 0,0 | 0 |  | 131 | 4,9 | 119 | 29 | 24,4 | 0 |  |  |
| SL | (672) | k. A. | k. A. | k. A. | k. A. | k. A. | k. A. | k. A. | k. A. | k. A. | k. A. | k. A. | k. A. |
| SN | 2.797 | 142 | 5,1 | 5.779 | 40,7 | 91 | 3,3 | 148 | 13 | 8,8 | 1 | 0,017 | 0,70 |
| ST | 1.551 | 27 | 1,7 | 1.118 | 41,4 | 17 | 1,1 | 11 | 1 | 9,1 | 0 | 0,000 | 0,00 |
| SH | 1.062 | 87 | 8,2 | 6.325 | 72,7 | 78 | 7,3 | 36 | 6 | 16,7 | 0 | 0,000 | 0,00 |
| TH | 1.301 | 65 | 5,0 | 0 | 0,0 | 50 | 3,8 | 53 | 5 | 9,4 | 0 |  | 0,00 |
| ABL* | 43.878* (44.550) | 4.916 | 11,2 | 324.747 | 66,1 | 3.994 | 9,1 | 2.439 | 508 | 20,8 | 21 | 0,006 | 0,43 |
| NBL* | 6.580* (7.685) | 406 | 6,2 | 17.410 | 42,9 | 312 | 4,7 | 273 | 24 | 8,8 | 1 | 0,006 | 0,25 |
| D* | 50.458* (52.208) | 5.322 | 10,5 | 342.157 | 64,3 | 4.306 | 8,5 | 2.712 | 532 | 19,6 | 22 | 0,006 | 0,41 |

* ohne BB und SL aufgrund fehlender Lockerungsdaten; ** möglicherweise Erhebungsfehler

**Tabelle 9: Freigang im Bundesländervergleich im Jahr 2020**

Strafgefangene insgesamt (einschließlich Jugendstrafvollzug)

| 1 | 2 | 3 | 4 | 5 | 6 | 7 | 8 | 9 | 10 | 11 | 12 | 13 | 14 |
| --- | --- | --- | --- | --- | --- | --- | --- | --- | --- | --- | --- | --- | --- |
| **BL** | **Strafgefangene** (am Stichtag 31.3.2020) (abs.) | **Gef., denen Freigang gewährt wurde**  (abs.) | Freigänger (Sp. 3) pro 100 Gefangene zum Stichtag | Anzahl der Tage im Freigang insg. (abs.) | Quotient Sp. 5 / Sp. 3 = Inzidenz, Zahl von Freigängen pro Gefangenen | Gef., denen erstmalig im Kalenderjahr Freigang gewährt wurde (abs.) | Erstmalig gewährter Freigang (Sp. 7) pro 100 Gefangene bzgl. Stich-tagsbelegung | Beendigung des Freigangs (abs.) | Davon durch Widerruf (abs.) | Anteil % Widerruf an Beendigungen des Frei-gangs insg. (Sp 10 / Sp 9 * 100) | Missbrauch: Nicht oder nicht frei-willig zurück-gekehrt aus Freigang (abs.) | **Missbrauch: %** von Sp. 12 bzgl. **Zahl von Tagen** im Freigang insg. (Sp. 5) | **Missbrauch: %** von Sp. 12 bzgl. Zahl der **Gefangenen** mit Freigang (Sp. 3) |
| BW | 5.099 | 742 | 14,6 | 51.614 | 69,6 | 455 | 8,9 | 550 | 50 | 9,1 | 2 | 0,004 | 0,27 |
| BY | 7.778 | 344 | 4,4 | 16.637 | 48,4 | 215 | 2,8 | 266 | 21 | 7,9 | 1 | 0,006 | 0,29 |
| BE | 2.725 | 41 | 1,5 | 804 | 19,6 | 35 | 1,3 | 363 | 7 | 1,9 | 0 | 0,000 | 0,00 |
| BB | 939 | 84 | 8,9 | 3.649 | 43,4 | 84 | 8,9 | 27 | 0 | 0,0 | 0 | 0,000 | 0,00 |
| HB | 509 | 143 | 28,1 | 13.262 | 92,7 | 122 | 24,0 | 65 | 4 | 6,2 | 2 | 0,015 | 1,40 |
| HH | 1.275 | 324 | 25,4 | 20.322 | 62,7 | 255 | 20,0 | 217 | 74 | 34,1 | 2 | 0,010 | 0,62 |
| HE | 3.301 | 197 | 6,0 | 7.598 | 38,6 | 134 | 4,1 | 126 | 24 | 19,0 | 0 | 0,000 | 0,00 |
| MV | 787 | 230 | 29,2 | 6.662 | 29,0 | 104 | 13,2 | 74 | 57 | 77,0 | 0 | 0,000 | 0,00 |
| NI | 3.874 | 351 | 9,1 | 26.327 | 75,0 | 302 | 7,8 | 189 | 151 | 79,9 | 0 | 0,000 | 0,00 |
| NW | 11.890 | 1.572 | 13,2 | 121.888 | 77,5 | 1.397 | 11,7 | 1.463 | 97 | 6,6 | 4 | 0,003 | 0,25 |
| RP | 2.410 | 158 | 6,6 | 11.011 | 69,7 | 151 | 6,3 | 101 | 14 | 13,9 | 0 | 0,000 | 0,00 |
| SL | (630) | k. A. | k. A. | k. A. | k. A. | k. A. | k. A. | k. A. | k. A. | k. A. | k. A. | k. A. | k. A. |
| SN | 2.436 | 98 | 4,0 | 4.306 | 43,9 | 54 | 2,2 | 101 | 7 | 6,9 | 1 | 0,023 | 1,02 |
| ST | 1.454 | 14 | 1,0 | 889 | 63,5 | 14 | 1,0 | 0 | 0 |  | 0 | 0,000 | 0,00 |
| SH | 891 | 63 | 7,1 | 4.748 | 75,4 | 61 | 6,8 | 35 | 8 | 22,9 | 0 | 0,000 | 0,00 |
| TH | 1.197 | 65 | 5,4 | 0 | 0,0 | 46 | 3,8 | 45 | 10 | 22,2 | 0 |  | 0,00 |
| ABL* | 39.752 (40.382) | 3.935 | 9,9 | 274.211 | 69,7 | 3.127 | 7,9 | 3.375 | 450 | 13,3 | 11 | 0,004 | 0,28 |
| NBL | 6.813 | 491 | 7,2 | 15.506 | 31,6 | 302 | 4,4 | 247 | 74 | 30,0 | 1 | 0,006 | 0,20 |
| D* | 46.565 (47.195) | 4.426 | 9,5 | 289.717 | 65,5 | 3.429 | 7,4 | 3.622 | 524 | 14,5 | 12 | 0,004 | 0,41 |

* ohne SL aufgrund fehlender Lockerungsdaten

**Tabelle 10: Freigang im Bundesländervergleich im Jahr 2021**

Strafgefangene insgesamt (einschließlich Jugendstrafvollzug)

| 1 | 2 | 3 | 4 | 5 | 6 | 7 | 8 | 9 | 10 | 11 | 12 | 13 | 14 |
| --- | --- | --- | --- | --- | --- | --- | --- | --- | --- | --- | --- | --- | --- |
| **BL** | **Strafgefangene** (am Stichtag 31.3.2021) (abs.) | **Gef., denen Freigang gewährt wurde**  (abs.) | Freigänger (Sp. 3) pro 100 Gefangene zum Stichtag | Anzahl der Tage im Freigang insg. (abs.) | Quotient Sp. 5 / Sp. 3 = Inzidenz, Zahl von Freigängen pro Gefan-genen | Gef., denen erstmalig im Kalenderjahr Freigang gewährt wurde (abs.) | Erstmalig gewährter Freigang (Sp. 7) pro 100 Gefangene bzgl. Stich-tagsbelegung | Beendigung des Freigangs (abs.) | Davon durch Widerruf (abs.) | Anteil % Widerruf an Beendigungen des Frei-gangs insg. (Sp 10 / Sp 9 * 100) | Missbrauch: Nicht oder nicht frei-willig zurück-gekehrt aus Freigang (abs.) | **Missbrauch: %** von Sp. 12 bzgl. **Zahl von Tagen** im Freigang insg. (Sp. 5) | **Missbrauch: %** von Sp. 12 bzgl. Zahl der **Gefangenen** mit Freigang (Sp. 3) |
| BW | 5.171 | 674 | 13,0 | 47.393 | 70,3 | 417 | 8,1 | 476 | 48 | 10,1 | 1 | 0,002 | 0,15 |
| BY | 7.267 | 134 | 1,8 | 6.885 | 51,4 | 113 | 1,6 | 85 | 5 | 5,9 | 2 | 0,029 | 1,49 |
| BE | 2.572 | 752 | 29,2 | * | * | 752 | 29,2 | 449 | 167 | 37,2 | 13 | * | 1,73 |
| BB | 925 | 48 | 5,2 | 4.153 | 86,5 | 48 | 5,2 | 11 | 0 | 0,0 | 0 | 0,000 | 0,00 |
| HB | 463 | 111 | 24,0 | 10.966 | 98,8 | 101 | 21,8 | 107 | 10 | 9,3 | 3 | 0,027 | 2,70 |
| HH | 1.327 | 265 | 20,0 | 23.101 | 87,2 | 236 | 17,8 | 117 | 7 | 6,0 | 2 | 0,009 | 0,75 |
| HE | 3.182 | 180 | 5,7 | 8.786 | 48,8 | 169 | 5,3 | 131 | 14 | 10,7 | 0 | 0,000 | 0,00 |
| MV | 828 | 133 | 16,1 | 6.697 | 50,4 | 82 | 9,9 | 86 | 5 | 5,8 | 1 | 0,015 | 0,75 |
| NI | 3.923 | 344 | 8,8 | 26.680 | 77,6 | 305 | 7,8 | 269 | 16 | 5,9 | 0 | 0,000 | 0,00 |
| NW | 11.680 | 1.614 | 13,8 | 118.737 | 73,6 | 1.286 | 11,0 | 1.633 | 175 | 10,7 | 5 | 0,004 | 0,31 |
| RP | 2.436 | 189 | 7,8 | 13.756 | 72,8 | 165 | 6,8 | 130 | 32 | 24,6 | 0 | 0,000 | 0,00 |
| SL | 626 | 38 | 6,1 | 2.690 | 70,8 | 37 | 5,9 | 34 | 19 | 55,9 | 0 | 0,000 | 0,00 |
| SN | 2.258 | 72 | 3,2 | 3.093 | 43,0 | 41 | 1,8 | 77 | 6 | 7,8 | 0 | 0,000 | 0,00 |
| ST | 1.480 | 21 | 1,4 | 1.069 | 50,9 | 19 | 1,3 | 11 | 1 | 9,1 | 0 | 0,000 | 0,00 |
| SH | 871 | 60 | 6,9 | 3.915 | 65,3 | 53 | 6,1 | 46 | 5 | 10,9 | 0 | 0,000 | 0,00 |
| TH | 1.207 | 19 | 1,6 | 1.032 | 54,3 | 17 | 1,4 | 989 | 0 | 0,0 | 0 | 0,000 | 0,00 |
| ABL | 39.518 | 4.361 | 11,0 | 262.909 | 60,3 | 3.634 | 9,2 | 3.477 | 498 | 14,3 | 26 | 0,010 | 0,60 |
| NBL | 6.698 | 293 | 4,4 | 16.044 | 54,8 | 207 | 3,1 | 1.174 | 12 | 1,0 | 1 | 0,006 | 0,34 |
| D | 46.216 | 4.654 | 10,1 | 278.953 | 59,9 | 3.841 | 8,3 | 4.651 | 510 | 11,0 | 27 | 0,010 | 0,58 |

* Anzahl der Tage kann in Berlin nicht ermittelt werden
